# Supplementary material
Source: HighWire-hosted journal article supplement (http://rc.rcjournal.com/highwire/filestream/16334/field_highwire_adjunct_files/1/suppl_2.pdf)
Supplement: suppl_2.pdf [file suppl_2.pdf]

**Supplemental table 2. characteristics of the 19 subjects with pulmonary edema-associated VAEs**

| No | Age | Sex | VAE-day <sup>a</sup> | NT-pro-BNP <sup>b</sup> | Cr <sup>c</sup> | CHF history | Main findings of echocardiography <sup>d</sup>                       |
|----|-----|-----|----------------------|-------------------------|-----------------|-------------|----------------------------------------------------------------------|
| 1  | 84  | M   | 8                    | 891.2                   | 1.53            | Yes         | LVEF: 60%, reverse E/A ratio, mild AR                                |
| 2  | 74  | M   | 8                    | NA                      | 0.9             | No          | LVEF :54%, small amount of pericardial effusion                      |
| 3  | 89  | F   | 7                    | >35000                  | 4.92            | Yes         | LVEF 56%, reverse E/A ratio, moderate AR                             |
| 4  | 78  | M   | 10                   | NA                      | 8.69            | No          | LVEF: 55%, reverse E/A ration, small amount of pericardial effusion  |
| 5  | 58  | M   | 6                    | 2311                    | 3.83            | No          | NA                                                                   |
| 6  | 88  | F   | 21                   | 885.9                   | 1.14            | Yes         | LVEF 40%, global hypokinesia                                         |
| 7  | 92  | M   | 12                   | 2127                    | 0.23            | No          | NA                                                                   |
| 8  | 59  | F   | 7                    | >35000                  | 3.05            | No          | NA                                                                   |
| 9  | 58  | F   | 28                   | NA                      | 1.45            | No          | NA. (pleural effusion: transudate)                                   |
| 10 | 65  | F   | 8                    | 16237                   | 1.04            | Yes         | NA                                                                   |
| 11 | 73  | M   | 13                   | 3419                    | 10.52           | No          | NA                                                                   |
| 12 | 91  | F   | 28                   | 15371                   | 1.32            | Yes         | LVEF: 50%, moderate AR, hypokinetic motion of proximal inferior wall |
| 13 | 38  | M   | 4                    | NA                      | 0.54            | No          | NA                                                                   |
| 14 | 84  | M   | 23                   | 2364                    | 0.93            | Yes         | LVEF: 60%, reverse E/A ratio, mild AR                                |
| 15 | 64  | M   | 51                   | NA                      | 1.89            | No          | LVEF 62%, reverse E/A ratio.                                         |
| 16 | 66  | M   | 6                    | 411                     | 0.48            | No          | LVEF 59%, reversed E/A ratio, prolapse of anterior mitral leaflets   |
| 17 | 93  | M   | 5                    | 22576                   | 2.32            | No          | NA                                                                   |
| 18 | 86  | M   | 4                    | >35000                  | 5.59            | Yes         | LVEF 37%, moderate AR, severe MR                                     |
| 19 | 71  | M   | 4                    | 333.5                   | 5.61            | Yes         | NA                                                                   |

<sup>a</sup>Days after receiving mechanical ventilation. <sup>b</sup>NT-pro-BNP (mg/dL) during admission. (Reference range: < 75-year-old: <125; >75-year-old <450)

<sup>c</sup>Serum creatinine (mg/dL) 3 days within VAE-diagnosis <sup>d</sup>Echocardiography two years within VAE-diagnosis

Abbreviations. VAE: ventilator-associated event; Cr: creatinine; CHF: congestive heart failure; NA: not available; LVEF: left ventricular ejection fraction; E/A ratio: ratio of peak velocity flow in early diastole (the E wave) to that in late diastole caused by atrial contraction (the A wave); AR: aortic regurgitation; MR: Mitral regurgitation.
